# Supplementary material for: Teaching and Learning Science through Multiple Representations: Intuitions and Executive Functions
Source: Atypon-hosted journal article supplement (doi:10.1187/cbe.19-11-0253), 2020-12-01
Supplement: combinedsupmats.pdf [file combinedsupmats.pdf]

# **Supplemental Material**

*CBE—Life Sciences Education*

Hansen and Richland

## SUPPLEMENTAL MATERIALS

Supplemental Materials provides several documents that support the main manuscript. First, we provide text of the preservice-teacher's version of the survey of beliefs about optimizing learning from two representations. Second, we describe the coding manual used to code free response data. Third, we provide a figure showing how simultaneous presentation of mitosis and meiosis was presented, and in this case, how signaling support was added (Figure S1. Simultaneous presentation with signaling support: Meiosis II).

### 1. Pre-service Teacher Study Text

#### Science Education Survey

Thank you for participating in this survey. We are currently developing new teaching materials to help students learn about cell reproduction through the processes of **mitosis** and **meiosis**. Your feedback will help us design these teaching materials. Please answer all of the questions to the best of your ability.

#### **PART A: Background Information**

1. **What is the highest level of Biology instruction you have had? (circle 1 answer)**
  - a. Middle school (grades 7-8 or ages 11-13) or less
  - b. High school (grades 9-12 or ages 14-18)
  - c. Undergraduate education
  - d. Graduate education
  
2. **In what country did you receive your pre-college science instruction: \_\_\_\_\_**
  
3. **Have you learned about the processes of cellular reproduction in the past?**
  - a. No
  - b. Yes
  
4. **Could you describe mitosis to a friend?**
  - a. No
  - b. Yes

5. Could you describe meiosis to a friend?

- a. No
- b. Yes

**PART B: Study Description**

You are going to be seeing some diagrams that describe the two ways cells reproduce: mitosis and meiosis. Before you see the diagrams, please tell us how you think the diagrams should be presented.

6. I think I would learn BEST if:

- a. Mitosis and Meiosis were shown together in ONE diagram
- b. Mitosis and Meiosis were shown one at a time in SEPARATE diagrams.

**Explain why you chose this answer:**

7. I think a middle school student (grades 7-8/ages 11-13) would learn BEST if:

- a. Mitosis and Meiosis were shown together in ONE diagram
- b. Mitosis and Meiosis were shown one at a time in SEPARATE diagrams.

**Explain why you chose this answer:**

**2. Adult Survey Coding Manual**

*In this survey, adults were asked:*

*“If you were just learning about two closely related science topics, such as osmosis and diffusion, and you received a diagram for each concept, would you rather have a separate diagram for each, or both presented together? Why?”*

*A follow-up item asked how a middle-school student should receive the same information (separated or combined diagram), and why.*

## CODES

*You will be coding the “why” portion of each of the above items. If the response includes the information the code is looking for, give it a 1. If not, leave it blank. In some cases, the respondent may have said, “Same reason as I gave in the first question.” In this case, go back to the coding for the first item and copy it to the second.*

**Compare/Contrast** – Respondent says that the presentation would help them compare and/or contrast similar diagrams.

Examples: That way I could compare them; I learn better if I can see the differences; They have many similarities, and this way I can see what is the same and what is unique.; I will be able to distinguish between the two better.

**Easier** – Respondent says the chosen presentation style is easier.

Examples: It’s easier to learn like that; It’s too hard if you have to remember one thing and go back and remember something else; It’s easier for kids to focus on one thing at a time.

**Confusion** – Response specifically suggests that preferred style will either help to avoid confusion, or that the alternate style is too confusing.

Examples: Having too much information on one page is confusing; I get confused when I have to remember something.

**Understand better** – Response indicates that the style of presentation would help the learner understand the concept better.

Examples: It will be better for me to code it into my working memory if I see them this way; It will help me organize my understanding; Younger children are able to grasp concepts better if they learn them together/separately.

3. Supplemental Figure: Sample of simultaneous diagrams

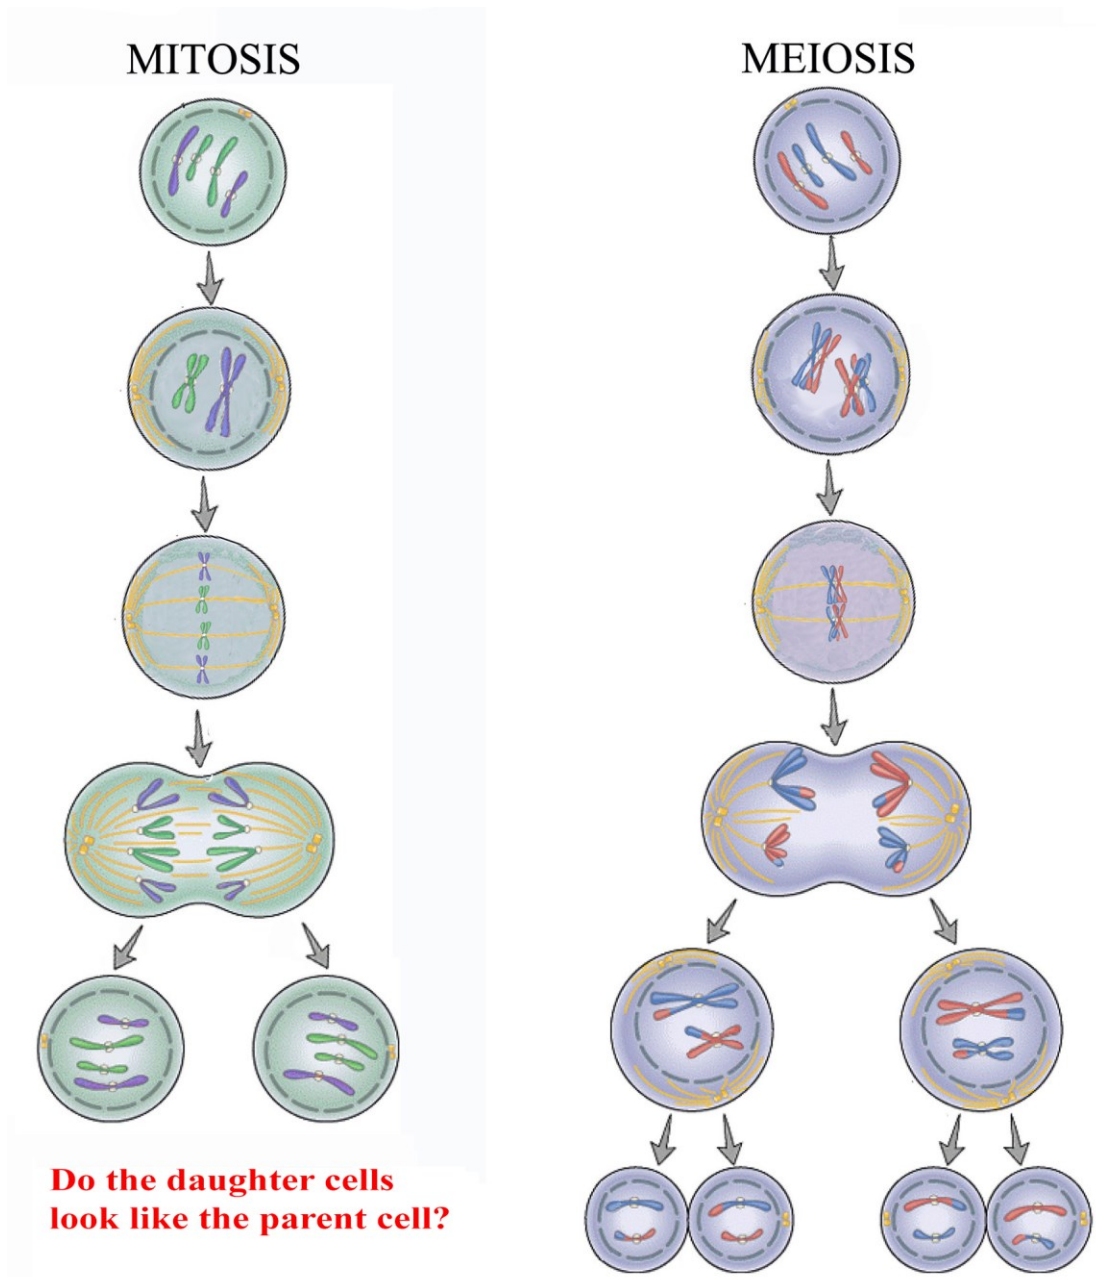

Figure S1. A diagram showing both mitosis and meiosis simultaneously, with Signaling Support.
